# Supplementary material for: β-Blocker Use and Clinical Outcomes in Patients With COPD Following Acute Myocardial Infarction
Source: PubMed Central journal article supplement (PMC11109775; doi:10.1001/jamanetworkopen.2024.7535), 2024-05-21
Supplement: jamanetwopen-e247535-s002.pdf [file jamanetwopen-e247535-s002.pdf]

## Data Sharing Statement

LaFon.  $\beta$ -Blocker Use and Clinical Outcomes in Patients With COPD Following Acute Myocardial Infarction. *JAMA Netw Open*. Published May 21, 2024.

doi:10.1001/jamanetworkopen.2024.7535

### Data

**Data available:** No

### Additional Information

**Explanation for why data not available:** The study is registered on clinicaltrials.gov (NCT04717492).
